# Supplementary material for: Prenatal Exposure to Air Pollutants and Attentional Deficit Hyperactivity Disorder Development in Children: A Systematic Review
Source: MDPI journal article supplement (doi:10.3390/ijerph20085443), 2023-04-07
Supplement: s1 [file s1]

# PRENATAL EXPOSURE TO AIR POLLUTANTS AND ATTENTIONAL DEFICIT HYPERACTIVITY DISORDER DEVELOPMENT IN CHILDREN: A SYSTEMATIC REVIEW

**Supplementary Table S1:** PECOS criteria for inclusion and exclusion of studies

Detailed PECOS (population, exposure, comparison, outcome, study type) table for the systematic review on air pollutants and ADHD.

|                 | Population                          | Exposure                                                                    | Comparison     | Outcome                                         | Type of study                                                                                               |
|-----------------|-------------------------------------|-----------------------------------------------------------------------------|----------------|-------------------------------------------------|-------------------------------------------------------------------------------------------------------------|
| <b>Included</b> | Pregnant women/Child population     | Air pollutants PM, NO <sub>x</sub> , SO <sub>2</sub> , O <sub>3</sub> , PAH | Not applicable | ADHD/hyperactivity                              | Observational studies (cohort, case-control and cross sectional)                                            |
| <b>Excluded</b> | Adults, in vitro and animal studies | Any other pollutants (e.g. bisphenol A)                                     | Not applicable | Other neurodevelopmental disorder (e.g. autism) | Controlled trials<br>Letters to the editor<br>Reviews<br>Case report<br>Interventional studies<br>Abstracts |

**Supplementary Table S2:** Newcastle-Ottawa Scale (NOS) quality and World Health Organization (WHO) Risk of Bias Assessment

| 1. Perera et al., 2012                                      |                                                                          |                    |
|-------------------------------------------------------------|--------------------------------------------------------------------------|--------------------|
| Design                                                      | Cohort study                                                             |                    |
| Participants                                                | Children, aged 6-7 years                                                 |                    |
| Exposure                                                    | PAH                                                                      |                    |
| Outcomes                                                    | Attention-Deficit/Hyperactivity Disorder                                 |                    |
| Quality Assessment                                          |                                                                          |                    |
| Newcastle-Ottawa Quality Assessment Scale-Case Cohort Study |                                                                          | Author's judgement |
| Selection                                                   | Representative of the exposed cohort                                     | *                  |
|                                                             | Selection of the non-exposed cohort                                      | *                  |
|                                                             | Ascertainment of exposure                                                | *                  |
|                                                             | Demonstration that outcome of interest was not present at start of study | *                  |
| Comparability                                               | Comparability of cohorts on the basis of the design of analysis          | **                 |
| Outcome                                                     | Assessment of outcome                                                    |                    |
|                                                             | Was follow-up long enough for outcome to occur                           | *                  |
|                                                             | Adequate of follow up of cohorts                                         |                    |
| World Health Organization - Risk of Bias Assessment         |                                                                          |                    |
| Domain                                                      |                                                                          | Author's judgement |
| Confounding                                                 |                                                                          | Low                |
| Selection Bias                                              |                                                                          | Low                |
| Exposure Assessment                                         |                                                                          | Low                |
| Outcome measurement                                         |                                                                          | Low                |
| Missing data                                                |                                                                          | Low                |
| Selective reporting                                         |                                                                          | Low                |

| 2. Gong et al., 2014                                        |                                                                          |                    |
|-------------------------------------------------------------|--------------------------------------------------------------------------|--------------------|
| Design                                                      | Cohort study                                                             |                    |
| Participants                                                | Children, aged 9-12 years                                                |                    |
| Exposure                                                    | PM <sub>10</sub> , NO <sub>x</sub>                                       |                    |
| Outcomes                                                    | Attention-Deficit/Hyperactivity Disorder                                 |                    |
| Quality Assessment                                          |                                                                          |                    |
| Newcastle-Ottawa Quality Assessment Scale-Case Cohort Study |                                                                          | Author's judgement |
| Selection                                                   | Representative of the exposed cohort                                     |                    |
|                                                             | Selection of the non-exposed cohort                                      | *                  |
|                                                             | Ascertainment of exposure                                                | *                  |
|                                                             | Demonstration that outcome of interest was not present at start of study | *                  |
| Comparability                                               | Comparability of cohorts on the basis of the design of analysis          | **                 |
| Outcome                                                     | Assessment of outcome                                                    | *                  |
|                                                             | Was follow-up long enough for outcome to occur                           | *                  |
|                                                             | Adequate of follow up of cohorts                                         |                    |
| World Health Organization - Risk of Bias Assessment         |                                                                          |                    |
| Domain                                                      |                                                                          | Author's judgement |
| Confounding                                                 |                                                                          | Low                |
| Selection Bias                                              |                                                                          | Low                |
| Exposure Assessment                                         |                                                                          | Moderate           |
| Outcome measurement                                         |                                                                          | Moderate           |
| Missing data                                                |                                                                          | Moderate           |
| Selective reporting                                         |                                                                          | Low                |

| 3. Perera et al., 2014                                      |                                                                          |                    |
|-------------------------------------------------------------|--------------------------------------------------------------------------|--------------------|
| Design                                                      | Cohort study                                                             |                    |
| Participants                                                | Children, aged 9 years                                                   |                    |
| Exposure                                                    | PAH                                                                      |                    |
| Outcomes                                                    | Attention-Deficit/Hyperactivity Disorder                                 |                    |
| Quality Assessment                                          |                                                                          |                    |
| Newcastle-Ottawa Quality Assessment Scale-Case Cohort Study |                                                                          | Author's judgement |
| Selection                                                   | Representative of the exposed cohort                                     | *                  |
|                                                             | Selection of the non-exposed cohort                                      | *                  |
|                                                             | Ascertainment of exposure                                                | *                  |
|                                                             | Demonstration that outcome of interest was not present at start of study | *                  |
| Comparability                                               | Comparability of cohorts on the basis of the design of analysis          | **                 |
| Outcome                                                     | Assessment of outcome                                                    |                    |
|                                                             | Was follow-up long enough for outcome to occur                           | *                  |
|                                                             | Adequate of follow up of cohorts                                         |                    |
| World Health Organization - Risk of Bias Assessment         |                                                                          |                    |
| Domain                                                      |                                                                          | Author's judgement |
| Confounding                                                 |                                                                          | Low                |
| Selection Bias                                              |                                                                          | Low                |
| Exposure Assessment                                         |                                                                          | Low                |
| Outcome measurement                                         |                                                                          | Low                |
| Missing data                                                |                                                                          | Low                |
| Selective reporting                                         |                                                                          | Low                |

| 4. Fuertes et al., 2016                                     |                                                                                             |                    |
|-------------------------------------------------------------|---------------------------------------------------------------------------------------------|--------------------|
| Design                                                      | Cohort study                                                                                |                    |
| Participants                                                | Children, aged 10-15 years                                                                  |                    |
| Exposure                                                    | PM <sub>10</sub> , PM <sub>2.5</sub> mass, PM <sub>2.5</sub> absorbance and NO <sub>2</sub> |                    |
| Outcomes                                                    | Attention-Deficit/Hyperactivity Disorder                                                    |                    |
| Quality Assessment                                          |                                                                                             |                    |
| Newcastle-Ottawa Quality Assessment Scale-Case Cohort Study |                                                                                             | Author's judgement |
| Selection                                                   | Representative of the exposed cohort                                                        | *                  |
|                                                             | Selection of the non-exposed cohort                                                         | *                  |
|                                                             | Ascertainment of exposure                                                                   | *                  |
|                                                             | Demonstration that outcome of interest was not present at start of study                    | *                  |
| Comparability                                               | Comparability of cohorts on the basis of the design of analysis                             | **                 |
| Outcome                                                     | Assessment of outcome                                                                       |                    |
|                                                             | Was follow-up long enough for outcome to occur                                              | *                  |
|                                                             | Adequate of follow up of cohorts                                                            | *                  |
| World Health Organization - Risk of Bias Assessment         |                                                                                             |                    |
| Domain                                                      |                                                                                             | Author's judgement |
| Confounding                                                 |                                                                                             | Low                |
| Selection Bias                                              |                                                                                             | Low                |
| Exposure Assessment                                         |                                                                                             | Low                |
| Outcome measurement                                         |                                                                                             | Moderate           |
| Missing data                                                |                                                                                             | Moderate           |
| Selective reporting                                         |                                                                                             | Low                |

| 5. Yorifuji et al., 2016                                    |                                                                          |                    |
|-------------------------------------------------------------|--------------------------------------------------------------------------|--------------------|
| Design                                                      | Cohort study                                                             |                    |
| Participants                                                | Children, aged 2.5 - 5.5 years                                           |                    |
| Exposure                                                    | SPM, NO <sub>2</sub> , SO <sub>2</sub>                                   |                    |
| Outcomes                                                    | Attention-Deficit/Hyperactivity Disorder                                 |                    |
| Quality Assessment                                          |                                                                          |                    |
| Newcastle-Ottawa Quality Assessment Scale-Case Cohort Study |                                                                          | Author's judgement |
| Selection                                                   | Representative of the exposed cohort                                     | *                  |
|                                                             | Selection of the non-exposed cohort                                      | *                  |
|                                                             | Ascertainment of exposure                                                | *                  |
|                                                             | Demonstration that outcome of interest was not present at start of study | *                  |
| Comparability                                               | Comparability of cohorts on the basis of the design of analysis          | **                 |
| Outcome                                                     | Assessment of outcome                                                    |                    |
|                                                             | Was follow-up long enough for outcome to occur                           | *                  |
|                                                             | Adequate of follow up of cohorts                                         |                    |
| World Health Organization - Risk of Bias Assessment         |                                                                          |                    |
| Domain                                                      |                                                                          | Author's judgement |
| Confounding                                                 |                                                                          | Low                |
| Selection Bias                                              |                                                                          | Low                |
| Exposure Assessment                                         |                                                                          | Low                |
| Outcome measurement                                         |                                                                          | Moderate           |
| Missing data                                                |                                                                          | Low                |
| Selective reporting                                         |                                                                          | Low                |

| 6. Yorifuji et al., 2017                                    |                                                                          |                    |
|-------------------------------------------------------------|--------------------------------------------------------------------------|--------------------|
| Design                                                      | Cohort study                                                             |                    |
| Participants                                                | Children, aged 8 years                                                   |                    |
| Exposure                                                    | SPM, NO <sub>2</sub> , SO <sub>2</sub>                                   |                    |
| Outcomes                                                    | Attention-Deficit/Hyperactivity Disorder                                 |                    |
| Quality Assessment                                          |                                                                          |                    |
| Newcastle-Ottawa Quality Assessment Scale-Case Cohort Study |                                                                          | Author's judgement |
| Selection                                                   | Representative of the exposed cohort                                     | *                  |
|                                                             | Selection of the non-exposed cohort                                      | *                  |
|                                                             | Ascertainment of exposure                                                | *                  |
|                                                             | Demonstration that outcome of interest was not present at start of study | *                  |
| Comparability                                               | Comparability of cohorts on the basis of the design of analysis          | **                 |
| Outcome                                                     | Assessment of outcome                                                    |                    |
|                                                             | Was follow-up long enough for outcome to occur                           | *                  |
|                                                             | Adequate of follow up of cohorts                                         |                    |
| World Health Organization - Risk of Bias Assessment         |                                                                          |                    |
| Domain                                                      |                                                                          | Author's judgement |
| Confounding                                                 |                                                                          | Low                |
| Selection Bias                                              |                                                                          | Low                |
| Exposure Assessment                                         |                                                                          | Low                |
| Outcome measurement                                         |                                                                          | Low                |
| Missing data                                                |                                                                          | Low                |
| Selective reporting                                         |                                                                          | Low                |

| 7. Forns et al., 2018                                       |                                                                                          |                    |
|-------------------------------------------------------------|------------------------------------------------------------------------------------------|--------------------|
| Design                                                      | Cohort study                                                                             |                    |
| Participants                                                | Children, aged 3-10 years                                                                |                    |
| Exposure                                                    | PM <sub>10</sub> , PM <sub>2.5</sub> , PM <sub>coarse</sub> and PM <sub>absorbance</sub> |                    |
| Outcomes                                                    | Attention-Deficit/Hyperactivity Disorder                                                 |                    |
| Quality Assessment                                          |                                                                                          |                    |
| Newcastle-Ottawa Quality Assessment Scale-Case Cohort Study |                                                                                          | Author's judgement |
| Selection                                                   | Representative of the exposed cohort                                                     | *                  |
|                                                             | Selection of the non-exposed cohort                                                      | *                  |
|                                                             | Ascertainment of exposure                                                                | *                  |
|                                                             | Demonstration that outcome of interest was not present at start of study                 | *                  |
| Comparability                                               | Comparability of cohorts on the basis of the design of analysis                          | **                 |
| Outcome                                                     | Assessment of outcome                                                                    |                    |
|                                                             | Was follow-up long enough for outcome to occur                                           | *                  |
|                                                             | Adequate of follow up of cohorts                                                         | *                  |
| World Health Organization - Risk of Bias Assessment         |                                                                                          |                    |
| Domain                                                      |                                                                                          | Author's judgement |
| Confounding                                                 |                                                                                          | Low                |
| Selection Bias                                              |                                                                                          | Low                |
| Exposure Assessment                                         |                                                                                          | Low                |
| Outcome measurement                                         |                                                                                          | Moderate           |
| Missing data                                                |                                                                                          | Moderate           |
| Selective reporting                                         |                                                                                          | Low                |



| 8. Perera et al., 2018                                      |                                                                          |                    |
|-------------------------------------------------------------|--------------------------------------------------------------------------|--------------------|
| Design                                                      | Cohort study                                                             |                    |
| Participants                                                | Children, aged 9 years                                                   |                    |
| Exposure                                                    | PAH                                                                      |                    |
| Outcomes                                                    | Attention-Deficit/Hyperactivity Disorder                                 |                    |
| Quality Assessment                                          |                                                                          |                    |
| Newcastle-Ottawa Quality Assessment Scale-Case Cohort Study |                                                                          | Author's judgement |
| Selection                                                   | Representative of the exposed cohort                                     | *                  |
|                                                             | Selection of the non-exposed cohort                                      | *                  |
|                                                             | Ascertainment of exposure                                                | *                  |
|                                                             | Demonstration that outcome of interest was not present at start of study | *                  |
| Comparability                                               | Comparability of cohorts on the basis of the design of analysis          | **                 |
| Outcome                                                     | Assessment of outcome                                                    |                    |
|                                                             | Was follow-up long enough for outcome to occur                           | *                  |
|                                                             | Adequate of follow up of cohorts                                         |                    |
| World Health Organization - Risk of Bias Assessment         |                                                                          |                    |
| Domain                                                      |                                                                          | Author's judgement |
| Confounding                                                 |                                                                          | Low                |
| Selection Bias                                              |                                                                          | Low                |
| Exposure Assessment                                         |                                                                          | Low                |
| Outcome measurement                                         |                                                                          | Low                |
| Missing data                                                |                                                                          | Low                |
| Selective reporting                                         |                                                                          | Low                |

| 9. Oudin et al., 2019                                       |                                                                          |                    |
|-------------------------------------------------------------|--------------------------------------------------------------------------|--------------------|
| Design                                                      | Cohort study                                                             |                    |
| Participants                                                | Children born between 1999 - 2009                                        |                    |
| Exposure                                                    | NO <sub>x</sub>                                                          |                    |
| Outcomes                                                    | Attention-Deficit/Hyperactivity Disorder                                 |                    |
| Quality Assessment                                          |                                                                          |                    |
| Newcastle-Ottawa Quality Assessment Scale-Case Cohort Study |                                                                          | Author's judgement |
| Selection                                                   | Representative of the exposed cohort                                     | *                  |
|                                                             | Selection of the non-exposed cohort                                      | *                  |
|                                                             | Ascertainment of exposure                                                | *                  |
|                                                             | Demonstration that outcome of interest was not present at start of study | *                  |
| Comparability                                               | Comparability of cohorts on the basis of the design of analysis          | **                 |
| Outcome                                                     | Assessment of outcome                                                    | *                  |
|                                                             | Was follow-up long enough for outcome to occur                           | *                  |
|                                                             | Adequate of follow up of cohorts                                         | *                  |
| World Health Organization - Risk of Bias Assessment         |                                                                          |                    |
| Domain                                                      |                                                                          | Author's judgement |
| Confounding                                                 |                                                                          | Low                |
| Selection Bias                                              |                                                                          | Low                |
| Exposure Assessment                                         |                                                                          | Moderate           |
| Outcome measurement                                         |                                                                          | Low                |
| Missing data                                                |                                                                          | Low                |
| Selective reporting                                         |                                                                          | Low                |

| 10. Pagliaccio et al., 2020                                 |                                                                          |                    |
|-------------------------------------------------------------|--------------------------------------------------------------------------|--------------------|
| Design                                                      | Cohort study                                                             |                    |
| Participants                                                | Children born between 1998 - 2006                                        |                    |
| Exposure                                                    | PAH                                                                      |                    |
| Outcomes                                                    | Attention-Deficit/Hyperactivity Disorder                                 |                    |
| Quality Assessment                                          |                                                                          |                    |
| Newcastle-Ottawa Quality Assessment Scale-Case Cohort Study |                                                                          | Author's judgement |
| Selection                                                   | Representative of the exposed cohort                                     | *                  |
|                                                             | Selection of the non-exposed cohort                                      | *                  |
|                                                             | Ascertainment of exposure                                                | *                  |
|                                                             | Demonstration that outcome of interest was not present at start of study | *                  |
| Comparability                                               | Comparability of cohorts on the basis of the design of analysis          | **                 |
| Outcome                                                     | Assessment of outcome                                                    |                    |
|                                                             | Was follow-up long enough for outcome to occur                           | *                  |
|                                                             | Adequate of follow up of cohorts                                         |                    |
| World Health Organization - Risk of Bias Assessment         |                                                                          |                    |
| Domain                                                      |                                                                          | Author's judgement |
| Confounding                                                 |                                                                          | Moderate           |
| Selection Bias                                              |                                                                          | Moderate           |
| Exposure Assessment                                         |                                                                          | Low                |
| Outcome measurement                                         |                                                                          | Moderate           |
| Missing data                                                |                                                                          | High               |
| Selective reporting                                         |                                                                          | Low                |

| 11. McGuinn et al., 2020                                    |                                                                          |                    |
|-------------------------------------------------------------|--------------------------------------------------------------------------|--------------------|
| Design                                                      | Cohort study                                                             |                    |
| Participants                                                | Children – mother pair                                                   |                    |
| Exposure                                                    | PM <sub>2.5</sub>                                                        |                    |
| Outcomes                                                    | Attention-Deficit/Hyperactivity Disorder                                 |                    |
| Quality Assessment                                          |                                                                          |                    |
| Newcastle-Ottawa Quality Assessment Scale-Case Cohort Study |                                                                          | Author's judgement |
| Selection                                                   | Representative of the exposed cohort                                     | *                  |
|                                                             | Selection of the non-exposed cohort                                      |                    |
|                                                             | Ascertainment of exposure                                                | *                  |
|                                                             | Demonstration that outcome of interest was not present at start of study | *                  |
| Comparability                                               | Comparability of cohorts on the basis of the design of analysis          | **                 |
| Outcome                                                     | Assessment of outcome                                                    |                    |
|                                                             | Was follow-up long enough for outcome to occur                           | *                  |
|                                                             | Adequate of follow up of cohorts                                         |                    |
| World Health Organization - Risk of Bias Assessment         |                                                                          |                    |
| Domain                                                      |                                                                          | Author's judgement |
| Confounding                                                 |                                                                          | Low                |
| Selection Bias                                              |                                                                          | Moderate           |
| Exposure Assessment                                         |                                                                          | Moderate           |
| Outcome measurement                                         |                                                                          | Low                |
| Missing data                                                |                                                                          | High               |
| Selective reporting                                         |                                                                          | Low                |

| 12. Shih et al., 2020                                       |                                                                                |                    |
|-------------------------------------------------------------|--------------------------------------------------------------------------------|--------------------|
| Design                                                      | Cohort study                                                                   |                    |
| Participants                                                | Children, aged 8 years                                                         |                    |
| Exposure                                                    | NO <sub>x</sub> , NO <sub>2</sub> , SO <sub>2</sub> , PM <sub>10</sub> or less |                    |
| Outcomes                                                    | Attention-Deficit/Hyperactivity Disorder                                       |                    |
| Quality Assessment                                          |                                                                                |                    |
| Newcastle-Ottawa Quality Assessment Scale-Case Cohort Study |                                                                                | Author's judgement |
| Selection                                                   | Representative of the exposed cohort                                           | *                  |
|                                                             | Selection of the non-exposed cohort                                            | *                  |
|                                                             | Ascertainment of exposure                                                      | *                  |
|                                                             | Demonstration that outcome of interest was not present at start of study       | *                  |
| Comparability                                               | Comparability of cohorts on the basis of the design of analysis                | **                 |
| Outcome                                                     | Assessment of outcome                                                          | *                  |
|                                                             | Was follow-up long enough for outcome to occur                                 | *                  |
|                                                             | Adequate of follow up of cohorts                                               | *                  |
| World Health Organization - Risk of Bias Assessment         |                                                                                |                    |
| Domain                                                      |                                                                                | Author's judgement |
| Confounding                                                 |                                                                                | Low                |
| Selection Bias                                              |                                                                                | Low                |
| Exposure Assessment                                         |                                                                                | Low                |
| Outcome measurement                                         |                                                                                | High               |
| Missing data                                                |                                                                                | Moderate           |
| Selective reporting                                         |                                                                                | Low                |

| 13. Peterson et al., 2022                                   |                                                                          |                    |
|-------------------------------------------------------------|--------------------------------------------------------------------------|--------------------|
| Design                                                      | Cohort study                                                             |                    |
| Participants                                                | Children, aged 6-14 years                                                |                    |
| Exposure                                                    | PM <sub>2.5</sub> , PAH                                                  |                    |
| Outcomes                                                    | Attention-Deficit/Hyperactivity Disorder                                 |                    |
| Quality Assessment                                          |                                                                          |                    |
| Newcastle-Ottawa Quality Assessment Scale-Case Cohort Study |                                                                          | Author's judgement |
| Selection                                                   | Representative of the exposed cohort                                     | *                  |
|                                                             | Selection of the non-exposed cohort                                      | *                  |
|                                                             | Ascertainment of exposure                                                | *                  |
|                                                             | Demonstration that outcome of interest was not present at start of study | *                  |
| Comparability                                               | Comparability of cohorts on the basis of the design of analysis          | *                  |
| Outcome                                                     | Assessment of outcome                                                    | *                  |
|                                                             | Was follow-up long enough for outcome to occur                           | *                  |
|                                                             | Adequate of follow up of cohorts                                         |                    |
| World Health Organization - Risk of Bias Assessment         |                                                                          |                    |
| Domain                                                      |                                                                          | Author's judgement |
| Confounding                                                 |                                                                          | Low                |
| Selection Bias                                              |                                                                          | Low                |
| Exposure Assessment                                         |                                                                          | Moderate           |
| Outcome measurement                                         |                                                                          | Low                |
| Missing data                                                |                                                                          | Low                |
| Selective reporting                                         |                                                                          | Low                |

| 14. Chang et al., 2022                                      |                                                                          |                    |
|-------------------------------------------------------------|--------------------------------------------------------------------------|--------------------|
| Design                                                      | Cohort study                                                             |                    |
| Participants                                                | Children, aged 5 years                                                   |                    |
| Exposure                                                    | PM <sub>2.5</sub>                                                        |                    |
| Outcomes                                                    | Attention-Deficit/Hyperactivity Disorder                                 |                    |
| Quality Assessment                                          |                                                                          |                    |
| Newcastle-Ottawa Quality Assessment Scale-Case Cohort Study |                                                                          | Author's judgement |
| Selection                                                   | Representative of the exposed cohort                                     | *                  |
|                                                             | Selection of the non-exposed cohort                                      | *                  |
|                                                             | Ascertainment of exposure                                                | *                  |
|                                                             | Demonstration that outcome of interest was not present at start of study | *                  |
| Comparability                                               | Comparability of cohorts on the basis of the design of analysis          | **                 |
| Outcome                                                     | Assessment of outcome                                                    | *                  |
|                                                             | Was follow-up long enough for outcome to occur                           | *                  |
|                                                             | Adequate of follow up of cohorts                                         | *                  |
| World Health Organization - Risk of Bias Assessment         |                                                                          |                    |
| Domain                                                      |                                                                          | Author's judgement |
| Confounding                                                 |                                                                          | Low                |
| Selection Bias                                              |                                                                          | Low                |
| Exposure Assessment                                         |                                                                          | Low                |
| Outcome measurement                                         |                                                                          | Moderate           |
| Missing data                                                |                                                                          | Low                |
| Selective reporting                                         |                                                                          | Low                |

| 15. Liu et al., 2022                                        |                                                                                                |                    |
|-------------------------------------------------------------|------------------------------------------------------------------------------------------------|--------------------|
| Design                                                      | Cohort study                                                                                   |                    |
| Participants                                                | Pregnancy                                                                                      |                    |
| Exposure                                                    | PM <sub>10</sub> , PM <sub>2.5</sub> , SO <sub>2</sub> , NO <sub>2</sub> , O <sub>3</sub> , CO |                    |
| Outcomes                                                    | Attention-Deficit/Hyperactivity Disorder                                                       |                    |
| Quality Assessment                                          |                                                                                                |                    |
| Newcastle-Ottawa Quality Assessment Scale-Case Cohort Study |                                                                                                | Author's judgement |
| Selection                                                   | Representative of the exposed cohort                                                           | *                  |
|                                                             | Selection of the non-exposed cohort                                                            | *                  |
|                                                             | Ascertainment of exposure                                                                      | *                  |
|                                                             | Demonstration that outcome of interest was not present at start of study                       | *                  |
| Comparability                                               | Comparability of cohorts on the basis of the design of analysis                                | **                 |
| Outcome                                                     | Assessment of outcome                                                                          |                    |
|                                                             | Was follow-up long enough for outcome to occur                                                 |                    |
|                                                             | Adequate of follow up of cohorts                                                               | *                  |
| World Health Organization - Risk of Bias Assessment         |                                                                                                |                    |
| Domain                                                      |                                                                                                | Author's judgement |
| Confounding                                                 |                                                                                                | Low                |
| Selection Bias                                              |                                                                                                | Low                |
| Exposure Assessment                                         |                                                                                                | Low                |
| Outcome measurement                                         |                                                                                                | Moderate           |
| Missing data                                                |                                                                                                | Low                |
| Selective reporting                                         |                                                                                                | Low                |
